# Supplementary material for: Development of fin-LEDs for next-generation inorganic displays using face-selective dielectrophoretic assembly
Source: PubMed Central journal article supplement — Nat Commun. 2024 Nov 4;15:9536. doi: 10.1038/s41467-024-53965-0 (PMC11535221; doi:10.1038/s41467-024-53965-0), 2024-11-04
Supplement: 41467_2024_53965_MOESM1_ESM.pdf [file 41467_2024_53965_MOESM1_ESM.pdf]

## **Supplementary Information for**

# **Development of Fin-LEDs for Next-generation Inorganic Displays using Face-selective Dielectrophoretic Assembly**

*SeungJe Lee<sup>1‡</sup>, Yun Jae Eo<sup>1‡</sup>, Minji Ko<sup>1</sup>, Soomin Ahn<sup>1</sup>, Selim Yun<sup>1</sup>, Hyeng Jin Kim<sup>1</sup>, Eunha Hong<sup>1</sup>, Yuna Kwon<sup>1</sup>, Huiyeong Kang<sup>1</sup>, Yong Jae Lee<sup>1</sup>, Gang Yeol Yoo<sup>2</sup>, Keyong Nam Lee<sup>1</sup>, Jae Kyu Song<sup>3</sup>, Jong Kyu Kim<sup>4</sup>, Hyun Min Cho<sup>2</sup>, Young Rag Do<sup>1\*</sup>*

<sup>1</sup>Department of Chemistry, Kookmin University, Seoul, Republic of Korea

<sup>2</sup>Display Research Center, Korea Electronics Technology Institute, Gyeonggi-do, Republic of Korea

<sup>3</sup>Department of Chemistry, Kyung Hee University, Seoul 130-701, Korea

<sup>4</sup>Department of Materials Science and Engineering, Pohang University of Science and Technology (POSTECH), Korea

Corresponding author: Young Rag Do (E-mail: [yrdo@kookmin.ac.kr](mailto:yrdo@kookmin.ac.kr))

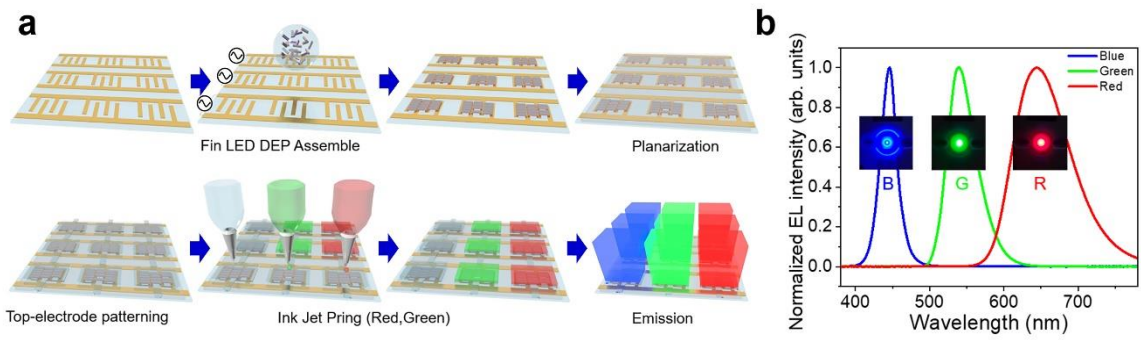

**Supplementary Fig. 1 | Schematic of implementing a full-color fin-LED Display**

**a** Schematic of full-color fin-LED display. **b** Fin-LED color conversion RGB EL spectrum (Blue: fin-LED, Green: fin-LED@InP QDs color film, Red: fin LED@R6832 phosphor color film).

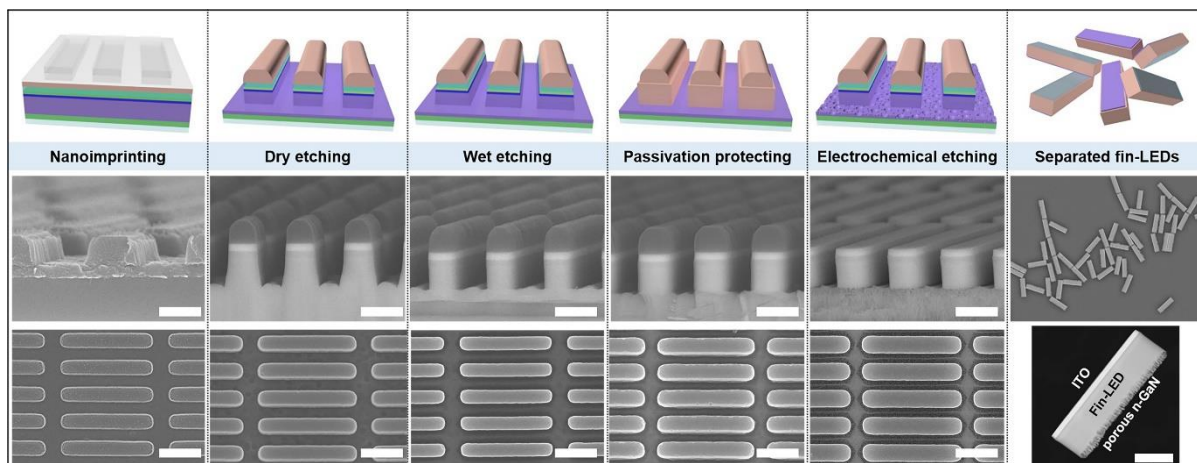

**Supplementary Fig. 2 | Schematic diagram of fin-LED fabrication process**

Electron microscopy images of each step of fabrication process of individually separated fin-LED. All scale bars represent 1  $\mu\text{m}$ .

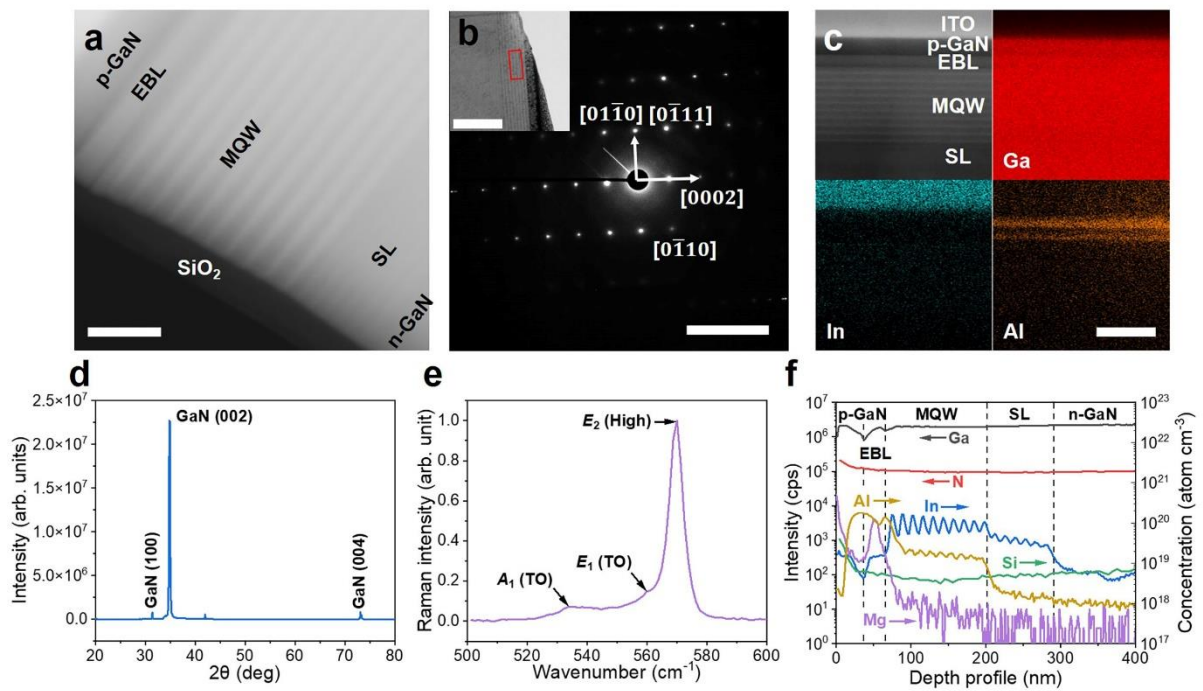

**Supplementary Fig. 3 | Additional analysis data for individually separated fin-LED**

**a** High-angle annular dark-field (HAADF)-STEM image of ITO/p-GaN/MQW/n-GaN@SiO<sub>2</sub> structured fin-LED. **b** Selected area electron diffraction (SAED) patterns of MQW of fin-LED. (Inset TEM image of fin-LED) **c** Energy-dispersive X-ray spectroscopy (EDX) images of fin-LED. **d** X-ray diffraction (XRD) spectrum of fin-LED. **e** Raman spectrum of fin-LED. **f** Dynamic-secondary ion mass spectroscopy (SIMS) depth profiles of fin-LED. EBL, electron blocking layer; MQW, multiple quantum well; SL, superlattice.

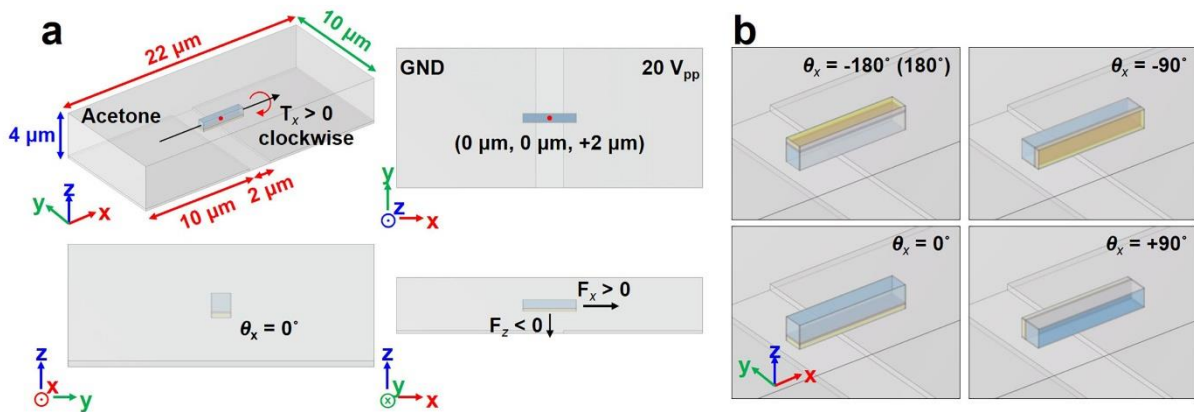

#### Supplementary Fig. 4 | Schematic of 3D model for finite element simulation (FEM)

**a** A pair of 10 μm × 10 μm electrodes were placed on the bottom with a 2 μm gap on the entire domain size of 22 μm × 10 μm × 4 μm. The center coordinates of a GaN-based light-emitting diode (LED) were arranged to be (0 μm, 0 μm, +2 μm). The remaining area except for the electrodes and LED was composed of solvent (acetone). **b** Schematic diagram according to x-axis rotation angle of the LED. It was set to 0° when the n-GaN was facing upward. The n- and p-GaN, ITO, and the shell layer on the side of the LED (SiO<sub>2</sub>) are expressed in blue, red, yellow, and white, respectively.

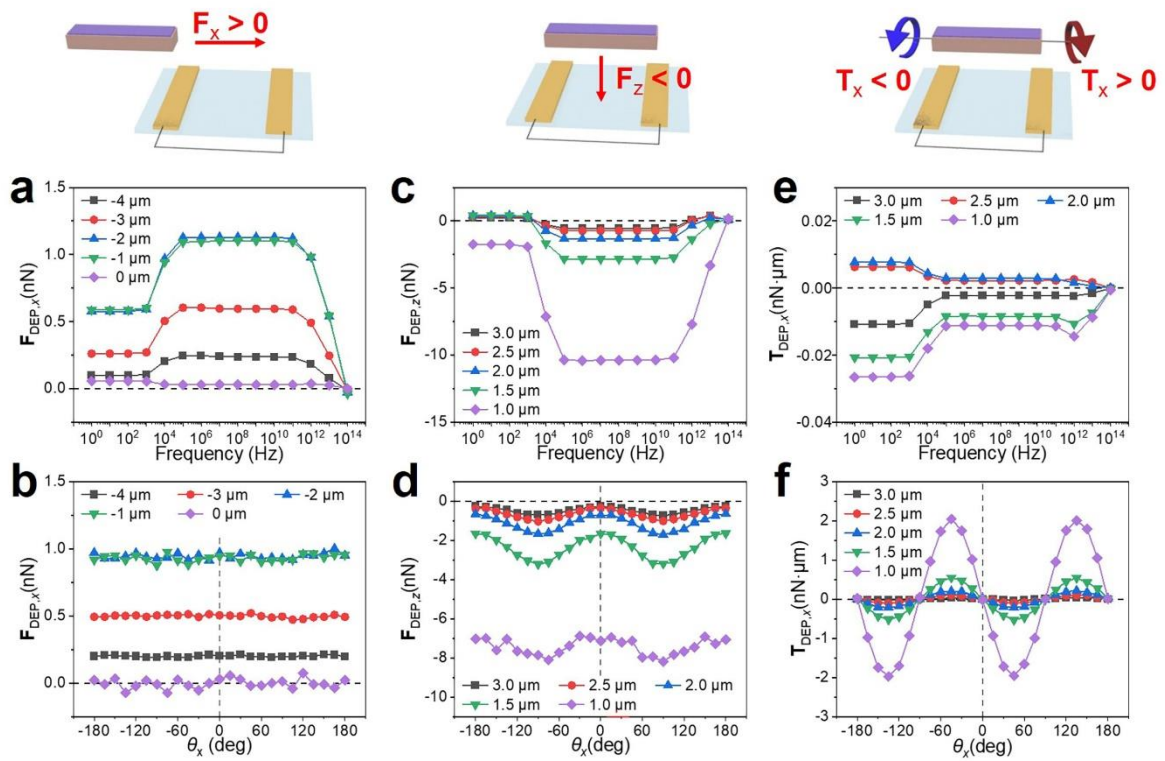

**Supplementary Fig. 5 | FEM simulation results of ITO/fin-LED@SiO<sub>2</sub> LED**

**a,b** The x-axis dielectrophoretic (DEP) force as a function of frequency of the LED with an x-angle of 0° and as a function of x-angle of the LED with a frequency of 10 kHz when the central coordinates of LED changed from (−4 μm, 0 μm, +2 μm) to (0 μm, 0 μm, +2 μm). **c,d** The z-axis DEP force as a function of frequency of the LED with an x-angle of 0° and as a function of x-angle of the LED with a frequency of 10 kHz when the central coordinates of LED changed from (0 μm, 0 μm, +3 μm) to (0 μm, 0 μm, +1 μm). **e,f** The x-axis DEP torque as a function of frequency of the LED with an x-angle of 0° and as a function of x-angle of the LED with a frequency of 10 kHz when the central coordinates of LED changed from (0 μm, 0 μm, +3 μm) to (0 μm, 0 μm, +1 μm).

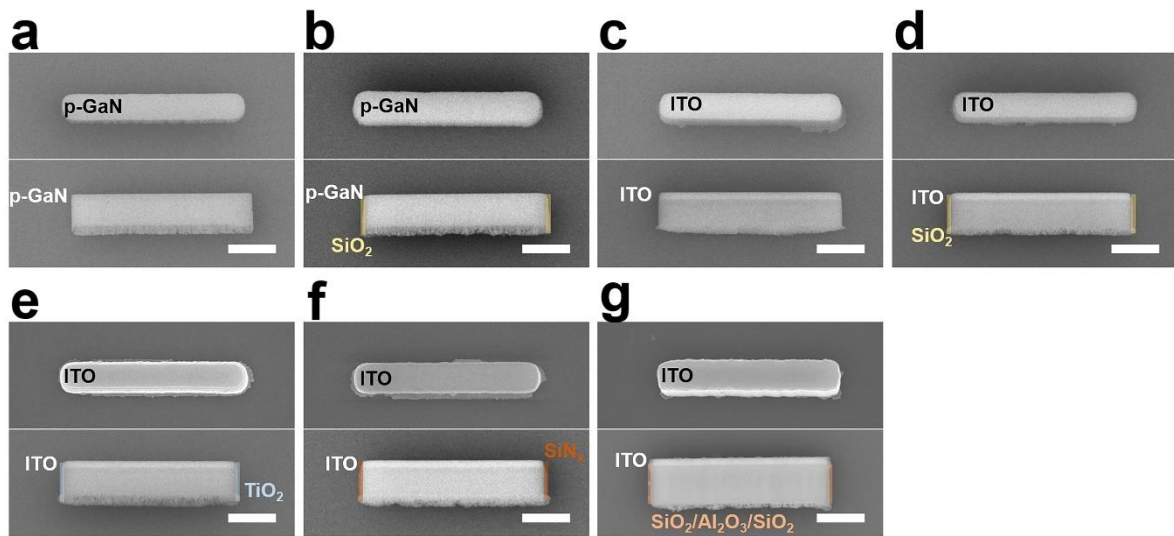

**Supplementary Fig. 6 | SEM images of fin-LED with different structures**

The upper images are the top view of the fin-LEDs and the lower images are the cross-sectional view of the fin-LEDs obtained in backscattered electron (BSE) mode. **a** fin-LED. **b** fin-LED@SiO<sub>2</sub>. **c** ITO/fin-LED. **d** ITO/fin-LED@SiO<sub>2</sub>. **e** ITO/fin-LED@TiO<sub>2</sub>. **f** ITO/fin-LED@SiN<sub>x</sub>. **g** ITO/fin-LED@SiO<sub>2</sub>/Al<sub>2</sub>O<sub>3</sub>/SiO<sub>2</sub>. All scale bars represent 1 μm.

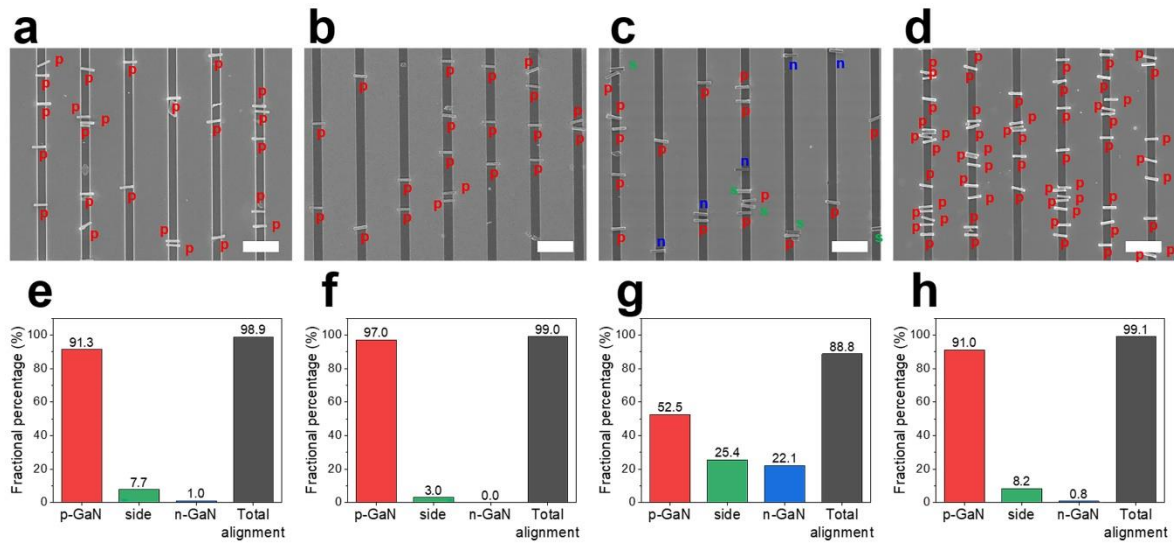

**Supplementary Fig. 7 | Self-assembly results of different structured fin-LED by DEP force**

**a–d** SEM image of ITO/fin-LED@SiO<sub>2</sub>, ITO/fin-LED@SiN<sub>x</sub>, ITO/fin-LED@TiO<sub>2</sub>, and ITO/fin-LED@SiO<sub>2</sub>/Al<sub>2</sub>O<sub>3</sub>/SiO<sub>2</sub> structures. To align the fin-LEDs of all structures, a sinusoidal function with a voltage of 20 V<sub>pp</sub> and a frequency of 10 kHz was applied to the electrodes. To indicate the contact surface between the fin-LEDs and electrodes, different colored letters were marked on the individual LEDs: red p, p-GaN contact; blue n, n-GaN contact; green s, side contact. All scale bars represent 10 μm. **e–h** Fractional ratio of different contact of ITO/fin-LED@SiO<sub>2</sub>, ITO/fin-LED@SiN<sub>x</sub>, ITO/fin-LED@TiO<sub>2</sub>, and ITO/fin-LED@SiO<sub>2</sub>/Al<sub>2</sub>O<sub>3</sub>/SiO<sub>2</sub> structures. All scale bars represent 10 μm.



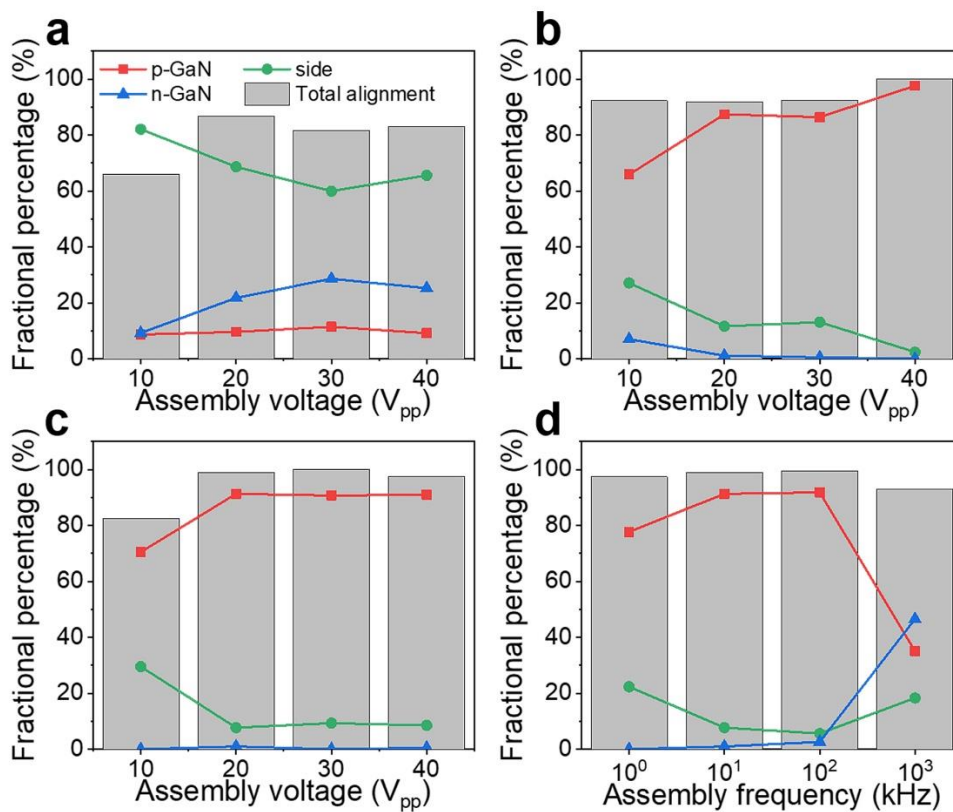

**Supplementary Fig. 8 | Fractional ratio of different ITO/fin-LED@SiO<sub>2</sub> with solvent**

**a–c** Fractional ratio in hexane, isopropyl alcohol (IPA) and acetone depending on the voltage with an applied frequency of 10 kHz (sinusoidal wave function). **d** The ratio in acetone depending on the frequency with an applied voltage of 20 V<sub>pp</sub>. All legends in the graphs are identical to those expressed in **a**.





C

|   | 1  | 2  | 3  | 4  | 5  | 6  | 7  | 8  | 9  | 10 | 11 | 12 | 13 | 14 | 15 | 16 | 17 | 18 | 19 | 20 | 21 | 22 | 23 | 24 | 25 | 26 | 27 | 28 |
|---|----|----|----|----|----|----|----|----|----|----|----|----|----|----|----|----|----|----|----|----|----|----|----|----|----|----|----|----|
| A | 35 | 32 | 34 | 36 | 33 | 39 | 38 | 39 | 41 | 38 | 36 | 37 | 40 | 37 | 43 | 47 | 40 | 44 | 45 | 31 | 31 | 30 | 37 | 37 | 42 | 35 | 38 | 37 |
| B | 38 | 38 | 35 | 36 | 41 | 36 | 36 | 39 | 33 | 35 | 37 | 44 | 33 | 39 | 35 | 44 | 37 | 39 | 49 | 32 | 30 | 34 | 33 | 32 | 39 | 39 | 38 | 39 |
| C | 44 | 40 | 42 | 33 | 39 | 30 | 33 | 29 | 36 | 40 | 36 | 26 | 40 | 35 | 41 | 34 | 38 | 44 | 37 | 34 | 39 | 35 | 29 | 33 | 39 | 38 | 35 | 33 |
| D | 35 | 31 | 35 | 43 | 42 | 37 | 33 | 39 | 36 | 40 | 32 | 32 | 35 | 33 | 35 | 32 | 38 | 41 | 37 | 33 | 31 | 36 | 32 | 28 | 34 | 37 | 37 | 34 |
| E | 38 | 29 | 22 | 29 | 31 | 31 | 33 | 30 | 31 | 36 | 29 | 31 | 33 | 34 | 35 | 37 | 32 | 36 | 32 | 35 | 29 | 31 | 32 | 31 | 30 | 36 | 33 | 33 |
| F | 35 | 23 | 29 | 31 | 28 | 29 | 34 | 36 | 34 | 35 | 25 | 28 | 30 | 30 | 33 | 29 | 31 | 33 | 32 | 28 | 37 | 38 | 39 | 36 | 31 | 41 | 34 | 33 |
| G | 35 | 32 | 29 | 30 | 31 | 33 | 32 | 33 | 32 | 32 | 37 | 28 | 31 | 28 | 41 | 32 | 31 | 31 | 35 | 34 | 29 | 30 | 30 | 32 | 29 | 39 | 38 | 33 |
| H | 43 | 26 | 28 | 23 | 33 | 34 | 32 | 31 | 31 | 40 | 30 | 33 | 30 | 36 | 32 | 42 | 37 | 30 | 36 | 34 | 34 | 35 | 32 | 34 | 32 | 33 | 30 | 25 |
| I | 41 | 28 | 33 | 43 | 35 | 32 | 35 | 30 | 37 | 35 | 37 | 32 | 29 | 36 | 34 | 33 | 39 | 28 | 38 | 30 | 32 | 29 | 39 | 36 | 31 | 33 | 35 | 35 |
| J | 31 | 35 | 29 | 27 | 31 | 25 | 41 | 26 | 31 | 29 | 32 | 23 | 32 | 24 | 22 | 31 | 30 | 37 | 36 | 28 | 22 | 35 | 34 | 36 | 38 | 32 | 30 | 31 |
| K | 32 | 23 | 26 | 28 | 23 | 32 | 29 | 27 | 27 | 27 | 25 | 29 | 30 | 22 | 27 | 33 | 26 | 33 | 30 | 28 | 31 | 32 | 36 | 35 | 35 | 33 | 31 | 26 |
| L | 29 | 27 | 31 | 27 | 33 | 19 | 27 | 24 | 28 | 23 | 26 | 25 | 30 | 29 | 30 | 28 | 29 | 32 | 33 | 29 | 34 | 30 | 30 | 36 | 40 | 38 | 28 | 31 |
| M | 32 | 27 | 30 | 30 | 30 | 28 | 26 | 30 | 34 | 27 | 31 | 30 | 28 | 29 | 29 | 24 | 32 | 27 | 27 | 32 | 32 | 37 | 31 | 34 | 37 | 28 | 31 | 37 |
| N | 34 | 26 | 15 | 30 | 25 | 30 | 23 | 30 | 33 | 31 | 34 | 29 | 31 | 29 | 36 | 32 | 35 | 33 | 34 | 32 | 33 | 35 | 37 | 35 | 45 | 26 | 36 |    |
| O | 29 | 24 | 21 | 19 | 23 | 29 | 27 | 28 | 22 | 22 | 32 | 29 | 26 | 25 | 31 | 33 | 27 | 26 | 34 | 31 | 36 | 30 | 33 | 36 | 36 | 37 | 40 | 27 |
| P | 22 | 20 | 21 | 28 | 19 | 26 | 25 | 24 | 17 | 28 | 26 | 31 | 22 | 24 | 33 | 32 | 31 | 25 | 27 | 22 | 37 | 29 | 38 | 32 | 35 | 36 | 29 | 25 |
| Q | 30 | 19 | 21 | 17 | 20 | 23 | 21 | 22 | 28 | 29 | 26 | 21 | 22 | 23 | 22 | 22 | 25 | 30 | 30 | 26 | 26 | 27 | 31 | 29 | 31 | 27 | 33 | 22 |
| R | 31 | 25 | 23 | 26 | 23 | 27 | 22 | 24 | 30 | 31 | 29 | 22 | 21 | 27 | 34 | 31 | 31 | 24 | 19 | 30 | 26 | 27 | 31 | 29 | 31 | 27 | 33 | 22 |
| S | 33 | 29 | 27 | 36 | 33 | 22 | 27 | 33 | 27 | 30 | 25 | 26 | 32 | 28 | 32 | 35 | 36 | 29 | 23 | 31 | 31 | 28 | 32 | 34 | 30 | 33 | 30 | 34 |
| T | 32 | 28 | 26 | 29 | 24 | 28 | 29 | 18 | 27 | 28 | 32 | 28 | 25 | 30 | 30 | 25 | 30 | 33 | 31 | 32 | 30 | 31 | 30 | 26 | 27 | 35 | 36 | 36 |
| U | 39 | 26 | 22 | 29 | 22 | 27 | 26 | 22 | 23 | 28 | 30 | 33 | 28 | 35 | 28 | 28 | 28 | 29 | 25 | 21 | 34 | 24 | 32 | 24 | 31 | 28 | 27 | 41 |

|   | 1  | 2  | 3  | 4  | 5  | 6  | 7  | 8  | 9  | 10 | 11 | 12 | 13 | 14 | 15 | 16 | 17 | 18 | 19 | 20 | 21 | 22 | 23 | 24 | 25 | 26 | 27 | 28 |
|---|----|----|----|----|----|----|----|----|----|----|----|----|----|----|----|----|----|----|----|----|----|----|----|----|----|----|----|----|
| A | 35 | 32 | 34 | 36 | 33 | 39 | 38 | 39 | 41 | 38 | 36 | 37 | 40 | 37 | 43 | 47 | 40 | 44 | 45 | 31 | 31 | 30 | 37 | 37 | 42 | 35 | 38 | 37 |
| B | 38 | 38 | 35 | 36 | 41 | 36 | 36 | 39 | 33 | 35 | 37 | 44 | 33 | 39 | 35 | 44 | 37 | 39 | 49 | 32 | 30 | 34 | 33 | 32 | 39 | 39 | 38 | 39 |
| C | 44 | 40 | 42 | 33 | 39 | 30 | 33 | 29 | 36 | 40 | 36 | 26 | 40 | 35 | 41 | 34 | 38 | 44 | 37 | 34 | 39 | 35 | 29 | 33 | 39 | 38 | 35 | 33 |
| D | 35 | 31 | 35 | 43 | 42 | 37 | 33 | 39 | 36 | 40 | 32 | 32 | 35 | 33 | 35 | 32 | 38 | 41 | 37 | 33 | 31 | 36 | 32 | 28 | 34 | 37 | 37 | 34 |
| E | 38 | 29 | 22 | 29 | 31 | 31 | 33 | 30 | 31 | 36 | 29 | 31 | 33 | 34 | 35 | 37 | 32 | 36 | 32 | 35 | 29 | 31 | 32 | 31 | 30 | 36 | 33 | 33 |
| F | 35 | 23 | 29 | 31 | 28 | 29 | 34 | 36 | 34 | 35 | 25 | 28 | 30 | 30 | 33 | 29 | 31 | 33 | 32 | 28 | 37 | 38 | 39 | 36 | 31 | 41 | 34 | 33 |
| G | 35 | 32 | 29 | 30 | 31 | 33 | 32 | 33 | 32 | 32 | 37 | 28 | 31 | 28 | 41 | 32 | 31 | 31 | 35 | 34 | 29 | 30 | 30 | 32 | 29 | 39 | 38 | 33 |
| H | 43 | 26 | 28 | 23 | 33 | 34 | 32 | 31 | 31 | 40 | 30 | 33 | 30 | 36 | 32 | 42 | 37 | 30 | 36 | 34 | 34 | 35 | 32 | 34 | 32 | 33 | 30 | 25 |
| I | 41 | 28 | 33 | 43 | 35 | 32 | 35 | 30 | 37 | 35 | 37 | 32 | 29 | 36 | 34 | 33 | 39 | 28 | 38 | 30 | 32 | 29 | 39 | 36 | 31 | 33 | 35 | 35 |
| J | 31 | 35 | 29 | 27 | 31 | 25 | 41 | 26 | 31 | 29 | 32 | 23 | 32 | 24 | 22 | 31 | 30 | 37 | 36 | 28 | 22 | 35 | 34 | 36 | 38 | 32 | 30 | 31 |
| K | 32 | 23 | 26 | 28 | 23 | 32 | 29 | 27 | 27 | 27 | 25 | 29 | 30 | 22 | 27 | 33 | 26 | 33 | 30 | 28 | 31 | 32 | 36 | 35 | 35 | 33 | 31 | 26 |
| L | 29 | 27 | 31 | 27 | 33 | 19 | 27 | 24 | 28 | 23 | 26 | 25 | 30 | 29 | 30 | 28 | 29 | 32 | 33 | 29 | 34 | 30 | 30 | 36 | 40 | 38 | 28 | 31 |
| M | 32 | 27 | 30 | 30 | 30 | 28 | 26 | 30 | 34 | 27 | 31 | 30 | 28 | 29 | 29 | 24 | 32 | 27 | 27 | 32 | 32 | 37 | 31 | 34 | 37 | 28 | 31 | 37 |
| N | 34 | 26 | 15 | 30 | 25 | 30 | 23 | 30 | 33 | 31 | 34 | 29 | 31 | 29 | 36 | 32 | 35 | 33 | 34 | 32 | 33 | 35 | 37 | 35 | 45 | 26 | 36 |    |
| O | 29 | 24 | 21 | 19 | 23 | 29 | 27 | 28 | 22 | 22 | 32 | 29 | 26 | 25 | 31 | 33 | 27 | 26 | 34 | 31 | 36 | 30 | 33 | 36 | 36 | 37 | 40 | 27 |
| P | 22 | 20 | 21 | 28 | 19 | 26 | 25 | 24 | 17 | 28 | 26 | 31 | 22 | 24 | 33 | 32 | 31 | 25 | 27 | 22 | 37 | 29 | 38 | 32 | 35 | 36 | 29 | 25 |
| Q | 30 | 19 | 21 | 17 | 20 | 23 | 21 | 22 | 28 | 29 | 26 | 21 | 22 | 23 | 22 | 22 | 25 | 30 | 30 | 26 | 26 | 27 | 31 | 29 | 31 | 27 | 33 | 22 |
| R | 31 | 25 | 23 | 26 | 23 | 27 | 22 | 24 | 30 | 31 | 29 | 22 | 21 | 27 | 34 | 31 | 31 | 24 | 19 | 30 | 26 | 27 | 31 | 29 | 31 | 27 | 33 | 22 |
| S | 33 | 29 | 27 | 36 | 33 | 22 | 27 | 33 | 27 | 30 | 25 | 26 | 32 | 28 | 32 | 35 | 36 | 29 | 23 | 31 | 31 | 28 | 32 | 34 | 30 | 33 | 30 | 34 |
| T | 32 | 28 | 26 | 29 | 24 | 28 | 29 | 18 | 27 | 28 | 32 | 28 | 25 | 30 | 30 | 25 | 30 | 33 | 31 | 32 | 30 | 31 | 30 | 26 | 27 | 35 | 36 | 36 |
| U | 39 | 26 | 22 | 29 | 22 | 27 | 26 | 22 | 23 | 28 | 30 | 33 | 28 | 35 | 28 | 28 | 28 | 29 | 25 | 21 | 34 | 24 | 32 | 24 | 31 | 28 | 27 | 41 |

d

|   | 1  | 2  | 3  | 4  | 5  | 6  | 7  | 8  | 9  | 10 | 11 | 12 | 13 | 14 | 15 | 16 | 17 | 18 | 19 | 20 | 21 | 22 | 23 | 24 | 25 | 26 | 27 | 28 |
|---|----|----|----|----|----|----|----|----|----|----|----|----|----|----|----|----|----|----|----|----|----|----|----|----|----|----|----|----|
| A | 39 | 33 | 34 | 38 | 35 | 34 | 48 | 47 | 41 | 46 | 40 | 40 | 41 | 48 | 52 | 43 | 40 | 23 | 28 | 46 | 58 | 54 | 48 | 51 | 41 | 42 | 49 | 52 |
| B | 32 | 39 | 36 | 30 | 21 | 23 | 23 | 32 | 27 | 36 | 32 | 36 | 39 | 32 | 29 | 26 | 20 | 32 | 27 | 45 | 34 | 32 | 34 | 43 | 36 | 36 | 38 | 47 |
| C | 31 | 34 | 24 | 20 | 23 | 30 | 27 | 18 | 25 | 32 | 26 | 32 | 25 | 28 | 33 | 27 | 29 | 29 | 30 | 31 | 29 | 38 | 29 | 32 | 31 | 40 | 33 | 46 |
| D | 29 | 27 | 17 | 29 | 24 | 24 | 24 | 19 | 20 | 23 | 32 | 21 | 31 | 22 | 21 | 21 | 32 | 35 | 45 | 36 | 45 | 52 | 34 | 29 | 26 | 27 | 34 | 50 |
| E | 35 | 27 | 27 | 22 | 27 | 27 | 32 | 16 | 28 | 31 | 31 | 31 | 34 | 24 | 27 | 32 | 37 | 39 | 48 | 39 | 39 | 53 | 32 | 30 | 28 | 38 | 36 | 39 |
| F | 37 | 32 | 22 | 23 | 29 | 22 | 19 | 30 | 24 | 22 | 34 | 29 | 29 | 33 | 25 | 32 | 25 | 38 | 44 | 28 | 29 | 28 | 27 | 18 | 32 | 30 | 34 | 42 |
| G | 36 | 32 | 24 | 28 | 28 | 27 | 22 | 23 | 31 | 18 | 17 | 32 | 32 | 26 | 24 | 20 | 37 | 22 | 32 | 25 | 21 | 33 | 34 | 29 | 28 | 27 | 40 | 53 |
| H | 29 | 23 | 27 | 24 | 58 | 24 | 27 | 23 | 24 | 31 | 29 | 19 | 28 | 31 | 29 | 23 | 25 | 25 | 21 | 21 | 20 | 29 | 36 | 27 | 18 | 28 | 36 | 37 |
| I | 25 | 31 | 32 | 44 | 52 | 30 | 25 | 27 | 25 | 26 | 23 | 25 | 22 | 28 | 25 | 23 | 22 | 28 | 32 | 20 | 34 | 30 | 32 | 25 | 29 | 33 | 42 | 29 |
| J | 39 | 35 | 33 | 28 | 29 | 32 | 29 | 16 | 20 | 33 | 22 | 28 | 24 | 22 | 21 | 23 | 15 | 24 | 29 | 28 | 20 | 22 | 25 | 29 | 25 | 19 | 26 | 40 |
| K | 38 | 29 | 29 | 24 | 24 | 30 | 22 | 27 | 30 | 17 | 29 | 46 | 37 | 27 | 25 | 25 | 29 | 27 | 59 | 30 | 37 | 27 | 25 | 20 | 25 | 26 | 23 | 36 |
| L | 29 | 30 | 26 | 25 | 24 | 33 | 30 | 35 | 24 | 28 | 22 | 32 | 33 | 22 | 20 | 34 | 35 | 49 | 58 | 27 | 23 | 26 | 25 | 31 | 22 | 30 | 28 | 31 |
| M | 32 | 29 | 34 | 18 | 26 | 21 | 23 | 30 | 26 | 26 | 20 | 23 | 35 | 25 | 32 | 40 | 32 | 34 | 34 | 32 | 33 | 43 | 32 | 39 | 29 | 35 | 34 | 52 |
| N | 36 | 19 | 33 | 24 | 30 | 24 | 24 | 22 | 29 | 26 | 19 | 23 | 30 | 31 | 34 | 58 | 50 | 35 | 28 | 24 | 28 | 31 | 34 | 33 | 27 | 42 | 46 | 46 |
| O | 39 | 25 | 23 | 31 | 31 | 23 | 25 | 19 | 20 | 29 | 23 | 25 | 19 | 31 | 37 | 27 | 32 | 37 | 3  |    |    |    |    |    |    |    |    |    |

**e**

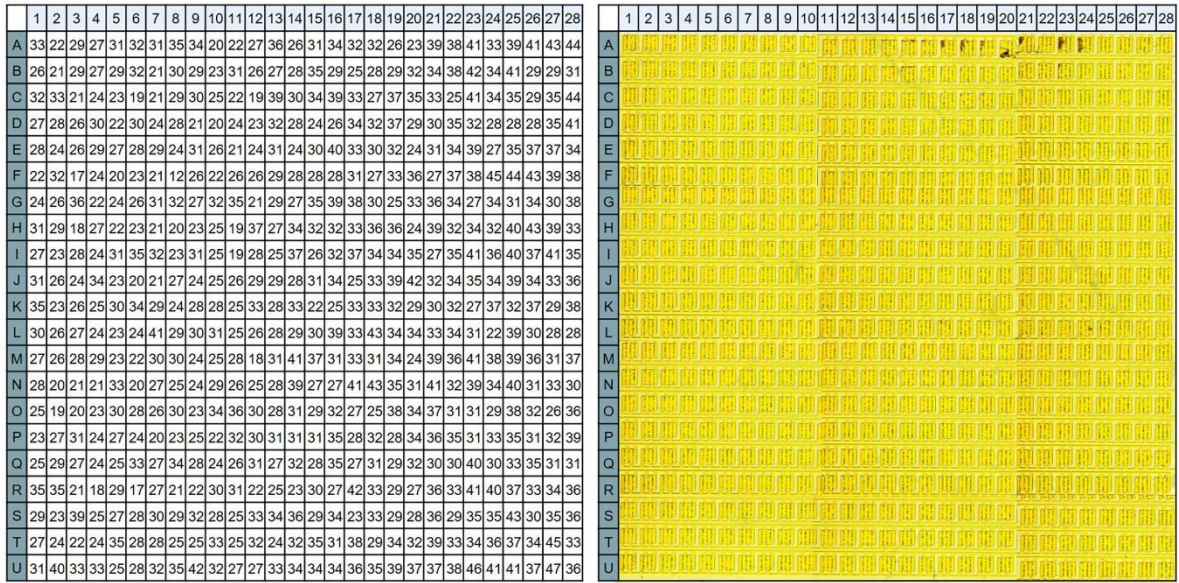

**Supplementary Fig. 9 | Optical microscope image of five fin-LED array devices with 588 subpixels**  
**a** Panel-1, mean: 30.47, standard deviation ( $\sigma$ ): 4.16. **b** Panel-2, mean: 31.06,  $\sigma$ : 6.40. **c** Panel-3, mean: 31.27,  $\sigma$ : 5.35. **d** Panel-4, mean: 30.44,  $\sigma$ : 7.97. **e** Panel-5, mean :30.50,  $\sigma$  :5.82 (Total subpixel: 2,940, Assembly accuracy: 99.93%).



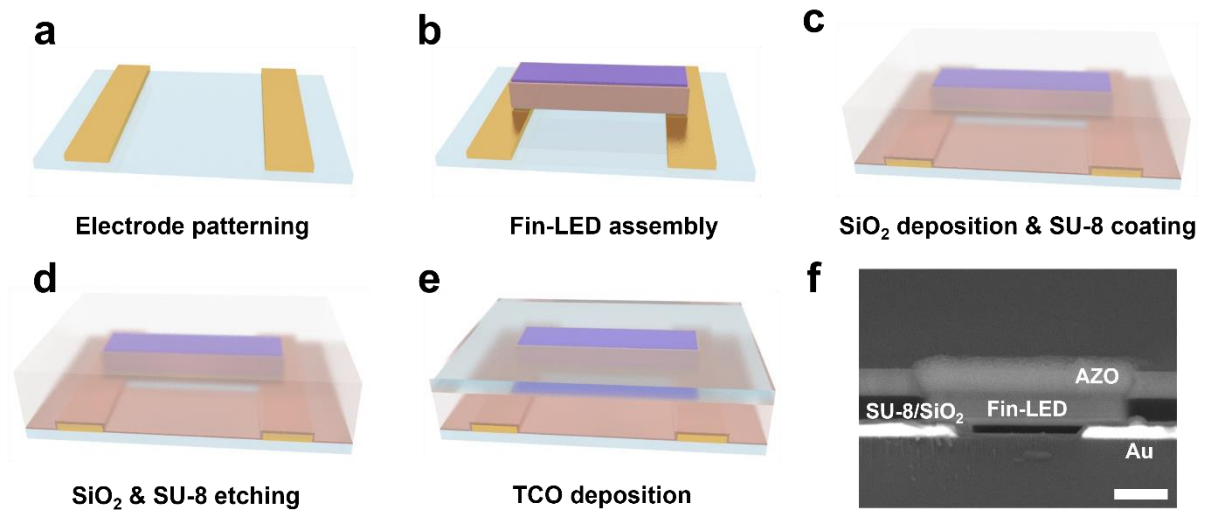

**Supplementary Fig. 10 | Schematics of fabrication of EL device based on the fin-LEDs**

**a** Fabrication of electrode. **b** Fin-LEDs DEP assembly. **c** SU-8 planarization coat & SiO<sub>2</sub> anchor deposition. **d** TCO deposition. **e** SEM image of fin-LEDs EL Device. Scale bar represents 1 μm

| Assembly         | Transfer method                                                    | Chip size ( $\mu\text{m}^2$ ) | Chip cost  | Transfer Cost | Transfer speed        | Transfer yield (%)  | Ref   |           |
|------------------|--------------------------------------------------------------------|-------------------------------|------------|---------------|-----------------------|---------------------|-------|-----------|
| Pick up          | Elastomer stamp                                                    | ~1,256.00                     | Middle     | High          | 1M hr <sup>-1</sup>   | 99.50               | [1,2] |           |
|                  | Laser                                                              | ~1.00                         | Low~Middle | Middle~High   | 100M hr <sup>-1</sup> | 99.80               | [1,2] |           |
| Fluidic assembly | Wave energy                                                        | ~1,256.00                     | Middle     | Middle        | NR                    | 97.00               | [3]   |           |
|                  | Gravity and capillary force                                        | ~1,256.00                     | Middle     | Middle        | 1M hr <sup>-1</sup>   | 99.90               | [4]   |           |
|                  | Vander walls force                                                 | 1,256.00                      | Middle     | Middle        | 54K hr <sup>-1</sup>  | 99.99               | [5]   |           |
|                  | Molten solder                                                      | 706.50                        | Middle     | Middle        | 1M hr <sup>-1</sup>   | 99.88               | [6]   |           |
|                  | magnetic-force-assisted dielectrophoretic self-assembly technology | ~980.20                       | Middle     | Middle        | NR                    | 99.50               | [7]   |           |
|                  | Dielectricphoresis                                                 |                               | ~0.19      | Low           | Low                   | NR                  | 99.98 | [8~13]    |
|                  |                                                                    |                               | 2.80       | Low           | Low                   | 1M hr <sup>-1</sup> | 99.93 | Our works |

**Supplementary Table 1 | Comparison for micro-LED mass transfer method**

| Volume<br>( $\mu\text{m}^2$ )<br>Shape | Area<br>of<br>MQW<br>( $\mu\text{m}^2$ ) | Orientation<br>selective<br>ratio<br>(%) | Aligned<br>direction | Wavelength<br>(nm) | Brightness<br>( $\text{cd m}^{-2}$ ) | EQE<br>(%) | Ref          |
|----------------------------------------|------------------------------------------|------------------------------------------|----------------------|--------------------|--------------------------------------|------------|--------------|
| 0.49, rod                              | 0.20                                     | NR                                       | Horizontal           | 515                | 2,130<br>(20V)                       | NR         | [8]          |
| 0.66, rod                              | 0.23                                     | 74.4                                     | Horizontal           | 515                | NR                                   | NR         | [9]          |
| 0.97, rod                              | 0.22                                     | NR                                       | Horizontal           | 448                | NR                                   | 8.9~20.2   | [10]         |
| 1.32, rod                              | 0.26                                     | NR                                       | Horizontal           | 445                | NR                                   | 9          | [11]         |
| 1.32, rod                              | 0.26                                     | NR                                       | Horizontal           | 460-464            | NR                                   | 19.6~22.2  | [11]         |
| 2.36, rod                              | 0.50                                     | NR                                       | Horizontal           | 440                | NR                                   | 2.6        | [12]         |
| 7.64, rod                              | 1.79                                     | NR                                       | Horizontal           | 445                | NR                                   | NR         | [13]         |
| 0.86, dot                              | 0.79                                     | NR                                       | Vertical             | 448                | 1,070.40<br>(10 V)                   | 6.21       | [14]         |
| 2.17, fin                              | 2.28                                     | 91.3                                     | Vertical             | 448                | 8,640<br>(5 V)                       | 9.1        | Our<br>works |

\*NR Non-reported

**Supplementary Table 2 | Comparison for micro-LED electric properties in sizes below  $10 \mu\text{m}^2$**

|                  | <b>Dielectric constant (<math>\epsilon_0</math>)</b> | <b>Electrical conductivity<br/>(<math>S\ m^{-1}</math>)</b> | <b>Reference</b> |
|------------------|------------------------------------------------------|-------------------------------------------------------------|------------------|
| n-GaN            | 8.9                                                  | $20 \times 10^3$                                            | [7]              |
| p-GaN            | 8.9                                                  | $2.38 \times 10^{-3}$                                       | [15]             |
| ITO              | 3.2                                                  | $10^6$                                                      | [15]             |
| SiO <sub>2</sub> | 3.9                                                  | $1 \times 10^{-12}$                                         | [16]             |
| Acetone          | 20.7                                                 | $20 \times 10^{-6}$                                         | [17]             |

**Supplementary Table 3 | Physical properties of materials used in FEM simulation**



## Supplementary References

1. Anwar, A.R., Lepkowski, S. P., *Laser photoics Rev.* **16**, 2100427 (2022).
2. Chen, D., Chen, Y.-C., Zeng, G., Zhang, D. W. & Lu, H.-L. Integration Technology of Micro-LED for Next-Generation Display. *Research* **6**, 0047 (2023).
3. Ryu, J. J. *et al.* Wave energy-assisted fluidic self-assembly of LED chips for display applications. *Journal of Information Display* **23**, 267–272 (2022).
4. Paul J. *et al.* Display with surface mount emissive elements US patent US009825202B2 (2017)
5. Hwang, J. *et al.* Wafer-scale alignment and integration of micro-light-emitting diodes using engineered van der Waals forces. *Nat Electron* **6**, 216–224 (2023).
6. Lee, D. *et al.* Fluidic self-assembly for MicroLED displays by controlled viscosity. *Nature* **619**, 755–760 (2023).
7. Chang, W. *et al.* Concurrent self-assembly of RGB microLEDs for next-generation displays. *Nature* **617**, 287–291 (2023).
8. Park, H. K. *et al.* Horizontally assembled green InGaN nanorod LEDs: scalable polarized surface emitting LEDs using electric-field assisted assembly. *Sci. Rep.* **6**, 28312 (2016)
9. Eo, Y. J. *et al.* Enhanced DC-Operated Electroluminescence of Forwardly Aligned p/MQW/n InGaN Nanorod LEDs via DC Offset-AC Dielectrophoresis. *ACS Appl. Mater. Interfaces* **9**, 37912–37920 (2017).
10. Sheen, M. *et al.* Highly efficient blue InGaN nanoscale light-emitting diodes. *Nature* **608**, 56–61 (2022).
11. Cho, H., Kim, D., Lee, S., Yoo, C. & Sim, Y. Efficiency enhancement of submicron-size light-emitting diodes by triple dielectric layers. *J. Soc. Inf. Disp.* **31**, 289–297 (2023).
12. Kim, S. *et al.* Self-array of one-dimensional GaN nanorods using the electric field on dielectrophoresis for the photonic emitters of display pixel. *Nanoscale Adv.* **5**, 1079–1085 (2023).
13. Kim, T., Uthirakumar, P., Cho, Y.-H., Nam, K. H. & Lee, I.-H. Enhanced quantum efficiency of horizontally aligned individual InGaN/GaN nanorod LEDs by self-assembled Ag nanoparticles. *Applied Surface Science* **656**, 159706 (2024).
14. Ko, M. *et al.* Development and Isolation of Dot LEDs for Display Applications through
15. Lin, Y.-C., Chen, L.-Y. & Chiu, F.-C. Lossy Mode Resonance-Based Glucose Sensor with High- $\kappa$  Dielectric Film. *Crystals* **9**, 450 (2019).
16. Wang, X., Wang, X.-B. & Gascoyne, P. R. C. General expressions for dielectrophoretic force and electrorotational torque derived using the Maxwell stress tensor method. *J. Electrostat.* **39**, 277–295 (1997).
17. Kato, C. *et al.* Quick and selective synthesis of  $\text{Li}_6[\alpha\text{-P}_2\text{W}_{18}\text{O}_{62}]\cdot 28\text{H}_2\text{O}$  soluble in various organic solvents. *Dalton Trans.* **42**, 11363 (2013).
