# Supplementary material for: Development of fin-LEDs for next-generation inorganic displays using face-selective dielectrophoretic assembly
Source: PubMed Central journal article supplement — Nat Commun. 2024 Nov 4;15:9536. doi: 10.1038/s41467-024-53965-0 (PMC11535221; doi:10.1038/s41467-024-53965-0), 2024-11-04
Supplement: 41467_2024_53965_MOESM2_ESM.pdf [file 41467_2024_53965_MOESM2_ESM.pdf]

## **Description of Additional Supplementary Files**

**Supplementary Move 1:** Video of a fin-LED assemble in pixel array using DEP.
